# Supplementary material for: Presupplementary Motor Area Hyperactivity During Response Inhibition: A Candidate Endophenotype of Obsessive-Compulsive Disorder
Source: Atypon-hosted journal article supplement (doi:10.1176/appi.ajp.2012.12010073), 2012-10-01
Supplement: 1100_ds001.pdf [file 1100_ds001.pdf]

## **SUPPLEMENTAL DATA**

### *S1.1 Excluded subjects*

From the initial set of 45 medication-free OCD patients, 39 healthy comparison subjects and 17 unaffected siblings that participated, four patients and two comparison subjects were excluded. Reasons for exclusion were the following: excessive head movement during scanning ( $>3\text{mm}$ ;  $N=2$  patients), behavioral outlier removal (SSRT  $> 3$  SD above group mean,  $N=1$  patient), data-loss due to technical problems ( $N=1$  comparison subject), and brain pathology accidentally discovered on the structural scan ( $N=2$ , one comparison subject and one patient). Twenty-eight patients gave permission for contacting their sibling(s), which resulted in the inclusion of 17 patient-sibling pairs (four siblings did not meet the inclusion criteria and seven siblings declined).

### *S1.2 Stop-signal task and data acquisition and analysis*

The horse-race model of response inhibition states that performance on stop trials is decided by the race between an excitatory Go-process and an inhibitory Stop-process. The fastest process will determine the outcome (i.e. Stop-Error or Stop-Success). Subjects indicated the direction of an arrow with a button-press of their right or left index finger respectively, as fast and accurate as possible. The stop-signal delay started at 250ms and was updated online by a tracking algorithm which subtracted 50ms from the delay after a Stop-Success-trial or added 50ms after a Stop-Error-trial. The subject-specific duration of the Stop-process (stop-signal reaction time; SSRT) was then calculated by subtracting the critical stop-signal delay (the mean delay when stop success is 50%) (4) from the median reaction time on Go-trials. Since the stop-signal delay had a fixed starting point, delay values of the last 75% of stop trials were averaged to give a stable stop-signal delay estimate for each subject. Trials were presented pseudo-randomly with the restriction that the first 12 trials were Go-trials and that Stop-trials did not succeed each other. Go-trials started with a fixation cross (500ms) followed by an arrow (1000ms). Stop-trials were identical to Go-trials, except that the arrow was superimposed by the stop-signal, a cross, after the stop-signal delay. The inter-trial interval jittered randomly between 1500-2500ms. Each subject

performed 252 trials. Task duration was around 16 minutes. The task was programmed in E-Prime 1.2 (Psychology Software Tools, Pittsburgh, PA, USA). To familiarize participants with the procedure, subjects performed a practice run of the task prior to scanning.

Stimuli were presented on a beamer screen visible through a mirror mounted on the 8-channel head coil. An MRI-compatible response box (Current Designs, Philadelphia, PA, USA) was used to collect the button-presses. To reduce motion artifacts in the imaging data, the subject's head was immobilized with foam pads. To ensure steady-state magnetization equilibrium, 3 dummy scans were made before data-acquisition (1). Coordinates of selected *inhibition*-related and *error*-related regions-of-interest are similar to previous reports (2;3)

### *S2.1 Co-morbid diagnoses*

Twenty-two OCD patients (54%) met criteria for one or more current axis-I diagnosis aside from their primary diagnosis of OCD: specific phobia (N=10), mood disorder (N=9), social phobia (N=5), panic disorder (N=3), eating disorder (N=2), agoraphobia (N=1), somatoform disorder (N=1) and Tourette's Syndrome (N=1).

Siblings had no current axis 1 psychiatric diagnosis apart from one sibling meeting criteria for an anxiety disorder not otherwise specified and one having moderate claustrophobia that did not interfere with the scanning session.

### *S2.2 Demographic, clinical and behavioral results of the subjects in the analysis with 17 patient-sibling pairs and 17 matched comparison subjects.*

The three groups included in the fMRI three-group ANOVA (N=51) did not differ from each other on demographic or behavioral data (see Supplemental Table S1), except from gender showing a near-trend effect. Post-hoc tests showed that the percentage males in the sibling group was significantly higher as compared to patients [ $\chi^2=4.25$ ,  $p=.039$ , two-tailed], while comparison subjects did not differ from patients and siblings in gender ratio [ $\chi^2=.48$ ,  $p=.486$ , two-tailed; and  $\chi^2=1.94$ ,  $p=.16$ , two-tailed, respectively]. As in the analysis including the complete samples, post-hoc tests showed that patients had significantly higher scores on the Yale-Brown Obsessive-Compulsive Scale, Obsessive-Compulsive Inventory-Revised and

Montgomery Åsberg Depression Rating Scale compared with both comparison subjects and siblings (all  $p < .05$ ), while there was no difference between siblings and comparison subjects on these clinical variables (all  $p > .60$ ).

The subsets of OCD patients and comparison subjects included in the three-group comparison also did not differ from the complete samples of OCD patients and comparison subjects in demographic, clinical or behavioral measures (all  $p > .17$ ).

**Table S1.** Demographic, clinical and behavioral measures from 17 patient-sibling pairs and 17 matched healthy comparison subjects included in the fMRI three-group comparison

|                                                                 | OCD patients<br>(N=17) |       | Siblings<br>(N=17) |       | Comparison<br>subjects<br>(N=17) |       | Statistical analysis |         |
|-----------------------------------------------------------------|------------------------|-------|--------------------|-------|----------------------------------|-------|----------------------|---------|
|                                                                 | Mean                   | SD    | Mean               | SD    | Mean                             | SD    | F (df=2, 48)         | p-value |
| <i>Demographic measures</i>                                     |                        |       |                    |       |                                  |       |                      |         |
| Age (years)                                                     | 37.9                   | 10.7  | 38.3               | 13.4  | 38.9                             | 12.4  | 0.03                 | 0.972   |
| Gender (men:women, (% men))                                     | 6:11                   | (35%) | 12:5               | (71%) | 8:9                              | (47%) | $\chi^2=4.4$         | 0.111   |
| Handedness (right:left, (% right))                              | 16:1                   | (94%) | 13:4               | (77%) | 13:4                             | (77%) | $\chi^2=2.4$         | 0.297   |
| Educational level (years) <sup>a</sup>                          | 5.7                    | 1.4   | 5.7                | 1.3   | 5.8                              | 2.4   | 0.2 <sup>b</sup>     | 0.891   |
| <i>Clinical measures</i>                                        |                        |       |                    |       |                                  |       |                      |         |
| Yale-Brown Obsessive-Compulsive Scale (points)                  | 21.4                   | 6.4   | 0.1                | 0.2   | 0.0                              | 0     | 45.8 <sup>b</sup>    | <.001   |
| Obsessive-Compulsive Inventory-Revised, total score (points)    | 25.0                   | 12.7  | 4.1                | 1.1   | 4.4                              | 6.1   | 28.7 <sup>b</sup>    | <.001   |
| Obsessive-Compulsive Inventory-Revised, washing score (points)  | 3.8                    | 4.5   | 0.2                | 0.4   | 0.4                              | 0.8   | 11.7 <sup>b</sup>    | .003    |
| Obsessive-Compulsive Inventory-Revised, checking score (points) | 6.2                    | 3.5   | 0.6                | 0.8   | 0.8                              | 1.1   | 26.9 <sup>b</sup>    | <.001   |
| Obsessive-Compulsive Inventory-Revised, symmetry score (points) | 4.8                    | 4.1   | 0.8                | 1.3   | 1.2                              | 2.0   | 13.1 <sup>b</sup>    | .001    |
| MADRS score (points)                                            | 11.2                   | 8.4   | 1.9                | 3.5   | 0.9                              | 1.6   | 23.4 <sup>b</sup>    | <.001   |
| <i>Behavioral measures</i>                                      |                        |       |                    |       |                                  |       |                      |         |
| SSRT (ms)                                                       | 200.4                  | 47.0  | 198.4              | 37.2  | 196.0                            | 34.5  | 0.07                 | 0.933   |
| Mean Go-trial reaction time (ms)                                | 679.4                  | 125.2 | 738.9              | 160.0 | 679.8                            | 152.2 | 0.9                  | 0.403   |
| Errors on Go-trials (%)                                         | 1.5                    | 1.7   | 1.8                | 2.4   | 0.9                              | 1.2   | 1.6 <sup>b</sup>     | 0.444   |

SD, standard deviation;  $\chi^2$ , Chi-square test (df=2); MADRS, Montgomery Åsberg Depression Rating Scale.

<sup>a</sup> Educational level was recorded in 9 levels ranging from 1 (no finished education) to 9 (university training).

<sup>b</sup> Kruskal-Wallis test; H(df=2, 48).

**Table S2A.** Main effect of *inhibition* over all subjects in whole-brain analysis (N=95)

| Region                                                                | BA | Side  | k <sub>e</sub> | Region-of-interest* | Coordinates <sup>a</sup> |     |     | Z    | p <sub>FWE</sub> |
|-----------------------------------------------------------------------|----|-------|----------------|---------------------|--------------------------|-----|-----|------|------------------|
|                                                                       |    |       |                |                     | x                        | y   | z   |      |                  |
| Occipital, parietal, temporal cortex                                  | 19 | R     | 3036           | N                   | 39                       | -85 | -5  | >8   | .000             |
|                                                                       | 37 |       |                | N                   | 42                       | -61 | -17 | >8   | .000             |
|                                                                       | 39 |       |                | N                   | 48                       | -73 | -8  | >8   | .000             |
|                                                                       | 40 |       |                | Y                   | 42                       | -55 | 43  | >8   | .000             |
| Occipital, parietal, temporal cortex                                  | 19 | L     | 2354           | N                   | -36                      | -88 | -5  | >8   | .000             |
|                                                                       | 37 |       |                | N                   | -42                      | -64 | -17 | >8   | .000             |
|                                                                       | 19 |       |                | N                   | -42                      | -79 | -5  | >8   | .000             |
|                                                                       | 40 |       |                | Y                   | -51                      | -55 | 43  | >8   | .000             |
| Prefrontal cortex, subcortical areas (including sub-thalamic nucleus) | 47 | R / L | 3387           | Y                   | 33                       | 23  | -11 | >8   | .000             |
|                                                                       | 9  |       |                | N                   | 45                       | 11  | 37  | >8   | .000             |
|                                                                       | 46 |       |                | N                   | 51                       | 17  | 19  | >8   | .000             |
|                                                                       | 6  |       |                | Y                   | 9                        | 17  | 67  | >8   | .000             |
|                                                                       | NA |       |                | Y                   | 3                        | -15 | -2  | 5.34 | .000             |
| Frontal cortex, subcortical areas                                     | 47 | L     | 1153           | Y                   | -33                      | 23  | -8  | >8   | .000             |
|                                                                       | 9  |       |                | N                   | -42                      | 17  | -8  | >8   | .000             |
|                                                                       | NA |       |                | N                   | -39                      | 23  | 40  | 7.58 | .000             |
| Caudate nucleus                                                       | NA | L     | 123            | N                   | -9                       | 11  | 1   | >8   | .000             |
| Mid-cingular cortex                                                   | 23 | R     | 74             | N                   | 3                        | -28 | 31  | 6.07 | .000             |
| Hippocampus                                                           | NA | R     | 37             | N                   | 24                       | -28 | -8  | 5.97 | .000             |
| Hippocampus                                                           | NA | L     | 4              | N                   | -24                      | -28 | -8  | 4.96 | .006             |
| Brainstem                                                             | NA | R     | 3              | N                   | 3                        | -22 | -20 | 4.75 | .014             |
| Mid-cingular cortex                                                   | 24 | R     | 5              | N                   | 3                        | -4  | 34  | 4.71 | .017             |
| Pre-supplementary motor area                                          | 6  | L     | 1              | Y                   | -15                      | 14  | 67  | 4.58 | .029             |

**Table S2B.** Main effect of *error* over all subjects in whole-brain analysis (N=95)

| Region                                                        | BA | Side  | k <sub>e</sub> | Region-of-interest* | Coordinates |     |     | Z    | p <sub>FWE</sub> |
|---------------------------------------------------------------|----|-------|----------------|---------------------|-------------|-----|-----|------|------------------|
|                                                               |    |       |                |                     | x           | y   | z   |      |                  |
| Cerebellum                                                    | NA | L / R | 1992           | N                   | -24         | -61 | -26 | 7.60 | .000             |
|                                                               |    |       |                | N                   | -15         | -58 | -17 | 7.55 | .000             |
|                                                               |    |       |                | N                   | 18          | -58 | -20 | 7.37 | .000             |
| Insula, postcentral gyrus, superior and middle temporal gyrus | 13 | L     | 534            | N                   | -51         | -22 | 16  | 6.82 | .000             |
|                                                               |    |       |                | N                   | -51         | -1  | 4   | 6.71 | .000             |
|                                                               |    |       |                | N                   | -45         | -28 | -19 | 6.53 | .000             |
| Postcentral gyrus, insula, superior temporal gyrus            | 43 | R     | 291            | N                   | 60          | -16 | 16  | 6.06 | .000             |
|                                                               |    |       |                | N                   | 51          | 8   | 1   | 5.85 | .000             |
|                                                               |    |       |                | N                   | 45          | -28 | 19  | 5.59 | .000             |
| Anterior cingulate cortex                                     | 32 | R/L   | 104            | Y                   | 0           | 20  | 34  | 5.99 | .000             |
| Pre-supplementary motor area                                  | 6  | R     | 13             | N                   | 9           | 8   | 70  | 5.60 | .000             |
| Precentral gyrus                                              | 4  | R     | 35             | N                   | 54          | -16 | 43  | 5.32 | .001             |
|                                                               |    |       |                |                     | 45          | -19 | 43  | 4.97 | .005             |
| Precentral gyrus                                              | 4  | L     | 10             | N                   | -54         | -22 | 43  | 5.01 | .001             |
| Thalamus                                                      | NA | L     | 4              | N                   | -15         | -22 | 4   | 4.66 | .039             |

BA, Brodmann Area; k<sub>e</sub>, cluster size; Z, Z-score; p<sub>FWE</sub>, Family-Wise Error corrected p-value for search volume; R, right; L, left; \*Peak used for Region-of-Interest analysis; Y, yes, N, No. Coordinates are in MNI space. *Inhibition*-contrast: Stop-Success-trials>Go-trials; *Error*-contrast: Stop-Error-trials>Stop-Success-trials.

**Table S3.** Main effect of *inhibition* and *error* per study group per region-of-interest.

| Region-of-interest           | Side | OCD patients (N=41) |     |     |                |      | Siblings (N=17)  |                          |     |    |                | Comparison subjects (N=37) |                  |                          |     |     |                |      |                  |
|------------------------------|------|---------------------|-----|-----|----------------|------|------------------|--------------------------|-----|----|----------------|----------------------------|------------------|--------------------------|-----|-----|----------------|------|------------------|
|                              |      | Coordinates         |     |     | k <sub>e</sub> | Z    | p <sub>FWE</sub> | Coordinates <sup>a</sup> |     |    | k <sub>e</sub> | Z                          | p <sub>FWE</sub> | Coordinates <sup>a</sup> |     |     | k <sub>e</sub> | Z    | p <sub>FWE</sub> |
|                              |      | x                   | y   | z   |                |      |                  | x                        | y   | z  |                |                            |                  | x                        | y   | z   |                |      |                  |
| <i>Inhibition</i>            |      |                     |     |     |                |      |                  |                          |     |    |                |                            |                  |                          |     |     |                |      |                  |
| Inferior frontal gyrus       | R    | 33                  | 23  | -11 | 132            | 6.87 | .000             | 36                       | 20  | -8 | 119            | 6.89                       | .000             | 36                       | 23  | -14 | 131            | 7.46 | .000             |
|                              | L    | -30                 | 20  | 1   | 123            | 6.24 | .000             | -33                      | 23  | -8 | 137            | 5.45                       | .000             | -33                      | 23  | -8  | 151            | 7.17 | .000             |
|                              |      | -30                 | 23  | -11 |                | 6.12 | .000             |                          |     |    |                |                            |                  |                          |     |     |                |      |                  |
|                              |      | -39                 | 17  | -8  |                | 6.05 | .000             |                          |     |    |                |                            |                  |                          |     |     |                |      |                  |
| Pre-supplementary motor area | R    | 9                   | 17  | 67  | 85             | 5.34 | .000             | 6                        | 17  | 64 | 112            | 4.75                       | .000             | 6                        | 20  | 58  | 76             | 4.63 | .000             |
|                              |      | 6                   | 17  | 58  |                | 5.29 | .000             | 18                       | 14  | 67 |                | 4.45                       | .000             | 9                        | 17  | 57  |                | 4.31 | .001             |
|                              | L    | -9                  | 20  | 64  | 39             | 4.05 | .001             | -12                      | 23  | 64 | 42             | 3.79                       | .003             | -                        |     |     |                |      |                  |
|                              |      |                     |     |     |                |      |                  | -15                      | 8   | 70 |                | 3.58                       | .012             |                          |     |     |                |      |                  |
| Inferior parietal cortex     | R    | 39                  | -55 | 43  | 162            | 6.18 | .000             | 51                       | -58 | 46 | 169            | 5.41                       | .000             | 45                       | -55 | 40  | 171            | 7.02 | .000             |
|                              |      | 48                  | -55 | 37  |                | 5.72 | .000             | 33                       | -58 | 46 |                | 5.38                       | .000             | 45                       | -58 | 52  |                | 6.44 | .000             |
|                              | L    | -51                 | -55 | 43  | 90             | 6.05 | .000             | -54                      | -52 | 37 | 80             | 3.91                       | .004             | -51                      | -58 | 49  | 159            | 6.96 | .000             |
|                              |      |                     |     |     |                |      |                  | -57                      | -61 | 37 |                |                            |                  |                          |     | 37  |                | 6.28 | .000             |
| Sub-thalamic nucleus         | R/L  | 0                   | -16 | -2  | 35             | 3.62 | .006             | 6                        | -10 | 7  | 1              | 3.00                       | .050             | 9                        | -10 | 4   | 71             | 4.14 | .005             |
|                              |      | 9                   | -10 | 4   | 1              | 3.07 | .032             |                          |     |    |                |                            |                  | 3                        | -19 | 1   |                | 3.49 | .011             |
| <i>Error</i>                 |      |                     |     |     |                |      |                  |                          |     |    |                |                            |                  |                          |     |     |                |      |                  |
| Anterior cingulate cortex    | R/L  | -3                  | 20  | 34  | 46             | 3.59 | .007             | 0                        | 23  | 25 | 7              | 3.29                       | .020             | 3                        | 20  | 34  | 117            | 4.31 | .001             |
|                              |      |                     |     |     |                |      |                  | 3                        | 29  | 31 | 1              | 3.08                       | .036             |                          |     |     |                |      |                  |

BA, Brodmann Area; k<sub>e</sub>, cluster size; Z, Z-score; FWE, Family-Wise Error corrected for search volume; R, right; L, left. Coordinates are in MNI space. *Inhibition*-contrast: Stop-Success-trials>Go-trials; *Error*-contrast: Stop-Error-trials>Stop-Success-trials.

## Supplemental References

### Reference List

1. Calhoun VD, Adali T, Pearlson GD, Pekar JJ: Spatial and temporal independent component analysis of functional MRI data containing a pair of task-related waveforms. *Hum Brain Mapp* 2001; 13(1):43-53
2. Chikazoe J: Localizing performance of go/no-go tasks to prefrontal cortical subregions. *Curr Opin Psychiatry* 2010; 23(3):267-272
3. Hampshire A, Chamberlain SR, Monti MM, Duncan J, Owen AM: The role of the right inferior frontal gyrus: inhibition and attentional control. *Neuroimage* 2010; 50(3):1313-1319
4. Logan GD: On the ability to inhibit thought and action: A users' guide to the stop signal paradigm, in *Inhibitory processes in attention, memory, and language*. San Diego, CA, USA, Academic Press, 1994, pp 189-239.
